# Supplementary material
Source: publisher figshare collection journal article supplement (https://diabetesjournals.figshare.com/articles/dataset/_/27737223)
Supplement: Supplementary file 1 [file 2]

## Supplementary Tables

**Table S1.** List of genotyping primers used.

|                            | Forward                      | Reverse                      |
|----------------------------|------------------------------|------------------------------|
| <i>INS</i> 5' homology arm | TGACCGCAGATTCAAGTGTT         | GCATGGCGGACTTGAAGAA          |
| <i>INS</i> 3' homology arm | GCACCATCTTCTTCAAGGAC<br>GAC  | AGCTCATGGTGCCATCTGAC         |
| <i>GCG</i> 5' homology arm | AGTAGTCACTGGTCCACATG<br>GGTT | CAGGATGTCCCAGGAGAAG<br>GGCAG |
| <i>GCG</i> 3' homology arm | CAGAAGCTGGTCGAGATCCG<br>GAAC | AGAACGGCTACAAGGCATG<br>ATGGG |

**Table S2.** Media formulations.

| Stage | Day   | Base Media                                                                                                                                                     | Morphogens                                                                |
|-------|-------|----------------------------------------------------------------------------------------------------------------------------------------------------------------|---------------------------------------------------------------------------|
| 1     | 0     | RPMI-1640; 1/200 Pen/Strep;<br>1x Glutamax                                                                                                                     | 0.2% FBS; 1:5,000 ITS; 0.100ng/ml Activin A; 3µM CHIR99021; 1µM JNJ       |
|       | 1     |                                                                                                                                                                | 0.2%FBS; 1:2000 ITS; 100ng/ml Activin A; 1 µM JNJ                         |
|       |       |                                                                                                                                                                |                                                                           |
| 2     | 2     |                                                                                                                                                                | 0.2%FBS; 1:1000 ITS; 25ng/ml KGF                                          |
|       | 3-4   |                                                                                                                                                                | 0.4%FBS; 1:1000 ITS; 25ng/ml KGF                                          |
| 3     | 5     | DMEM; 1/200 Pen/Strep; 1x Glutamax; 1x NEAA; 1mM Sodium Pyruvate                                                                                               | 1:100 B27; 3nM TTNPB; 250nM SANT-1; 250nM PdBU; 250nM LDN; 0.5mM 2-P-L-AA |
|       | 6     |                                                                                                                                                                | 1:100 B27; 3nM TTNPB; 0.5mM 2-P-L-AA                                      |
| 4     | 7-9   |                                                                                                                                                                | 1:100 B27; 50ng/ml EGF; 50ng/ml KGF; 0.5mM 2-P-LAA                        |
| 5     | 10-14 | DMEM; 1/200 Pen/Strep; 1x Glutamax; 1x NEAA; 1mM Pyruvate; 1% BSA; 1x ITS; 10 µg/ml Heparin; 2µM NAC; 10 µM Zn Sulphate; 1.75 µl β-ME/500ml                    | 10µM Alk5i (RepSox); 2µM T3; 0.5µM LDN; 1µM Xxi                           |
| 6.1   | 15-20 | CMRL; 1/200 Pen/Strep; 1x Glutamax; 1x NEAA; 1mM Pyruvate; 1% BSA; 1x ITS; 1x HEPES; 10 µg/ml Heparin; 2µM NAC; 10 µM Zn Sulphate; 1.75 µl β-ME/500ml (pH 7.4) | 10µM Alk5i (RepSox); 2µM T3; 0.155mM 2-P-L-AA                             |
| 6.2   | 21-26 |                                                                                                                                                                | 2µM T3; 0.155mM 2-P-LAA                                                   |
| 7     | 27+   |                                                                                                                                                                | 2µM T3; 1:2000 Trace A; 1:2000 Trace B; 1:2000 Lipid Conc; 0.5µM ZM447439 |

**Table S3.** List of TAQMAN primers used.

| Target Gene   | Probe                                | Primer 1                          | Primer 2                          |
|---------------|--------------------------------------|-----------------------------------|-----------------------------------|
| <i>INS</i>    | CGG CGG GTC TTG<br>GGT GTG TA        | CTA GTG TGC GGG<br>GAA CG         | CAC GCT TCT GCA<br>GGG AC         |
| <i>NKX6-1</i> | TGC TTC TTC CTC<br>CAC TTG GTC CG    | TCG TTT GGC CTA<br>TTC GTT GG     | TGT CTC CGA GTC<br>CTG CTT C      |
| <i>PCSK1</i>  | TCC CGA AGA GGA<br>GAC CTT CAT GTC A | CTA TCA AGT CCC<br>TGG AGC ATG    | TGT ATC CCG TTC<br>TCT TTC AGC    |
| <i>GCG</i>    | ATG GCG CTT GTC<br>CTC GTT CAT CT    | ACG TTC CCT TCA<br>AGA CAC AG     | GTC CAG ATA CTT<br>GCT GTA GTC AC |
| <i>ARX</i>    | CGG CAT TCG GCA<br>GGC TCT TTT C     | CTG AGC ACT TTC<br>CTC GGA G      | TGT GGG CTG TCT<br>CAG GAG        |
| <i>IRX2</i>   | CTG ATC CCT TCG<br>TCC TCT GCC G     | GAG AAA CAA AAG<br>CGA AGA TGA GG | CGA GTG ATC CGT<br>GAG CG         |

**Table S4.** List of NanoString target gene sequences.

| Target Gene    | Target Sequence                                                                                               |
|----------------|---------------------------------------------------------------------------------------------------------------|
| <i>INS</i>     | GGGTCCTGCAGAAGCGTGGCATTGTGGAACAATGCTGTACCAGC<br>ATCTGCTCCCTCTACCAGCTGGAGAACTACTGCAACTAGACGCAGC<br>CCGCAGGCA   |
| <i>GCG</i>     | TGGA CTCCAGGCGTGCCCAAGATTTTGTGCAGTGGTTGATGAATAC<br>CAAGAGGAACAGGAATAACATTGCCAAACGTCACGATGAATTTGA<br>GAGACATGC |
| <i>NKX6-1</i>  | CTGGCCTGTACCCCTCATCAAGGATCCATTTTGTGTTGGACAAAGACG<br>GGAAGAGAAAACACACGAGACCCACTTTTCCGGACAGCAGATCT<br>TCGCCCTGG |
| <i>ARX</i>     | TGCACTCAGCGTGGTATGGTAAAAGTTTGTCTCCCGTAGATTCTT<br>ACTGTGTTGTAGATACGGTAGGGTTCCTAGACAAATATTTATGTAC<br>TCAAGCCC   |
| <i>PCSK1</i>   | AGTGCAAAGCTCAACATCCCTTATGAAAACCTTCTACGAAGCCCTGG<br>AAAAGCTGAACAAACCTTCCCAGCTTAAAGACTCTGAAGACAGTC<br>TGTATAATG |
| <i>CHGA</i>    | CTGCGCCGGGCAAGTCACTGCGCTCCCTGTGAACAGCCCTATGAAT<br>AAAGGGGATACCGAGGTGATGAAATGCATCGTTGAGGTCATCTCC<br>GACACACTT  |
| <i>PAX4</i>    | CTGCCCATTTGTCCTTACCGTCCTGCCCATACAGACTGTGGCTCCTTC<br>CTCCTTCCTGTGATTGCTCCCTCCTGTGTGGACGTTGCCTGGCCCTG<br>CCTCGA |
| <i>SLC30A8</i> | CAGATGCAACCAATTCATTCAGTCCACGAGCATGATGTGAGCACTG<br>CTTTGTGCTAGACATTGGGCTTAGCATTGAAACTATAAAGAGGAAT<br>CAGACGCA  |
