# Supplementary material
Source: publisher figshare collection journal article supplement (https://diabetesjournals.figshare.com/articles/dataset/_/27737223)
Supplement: Supplementary file 2 [file 2]

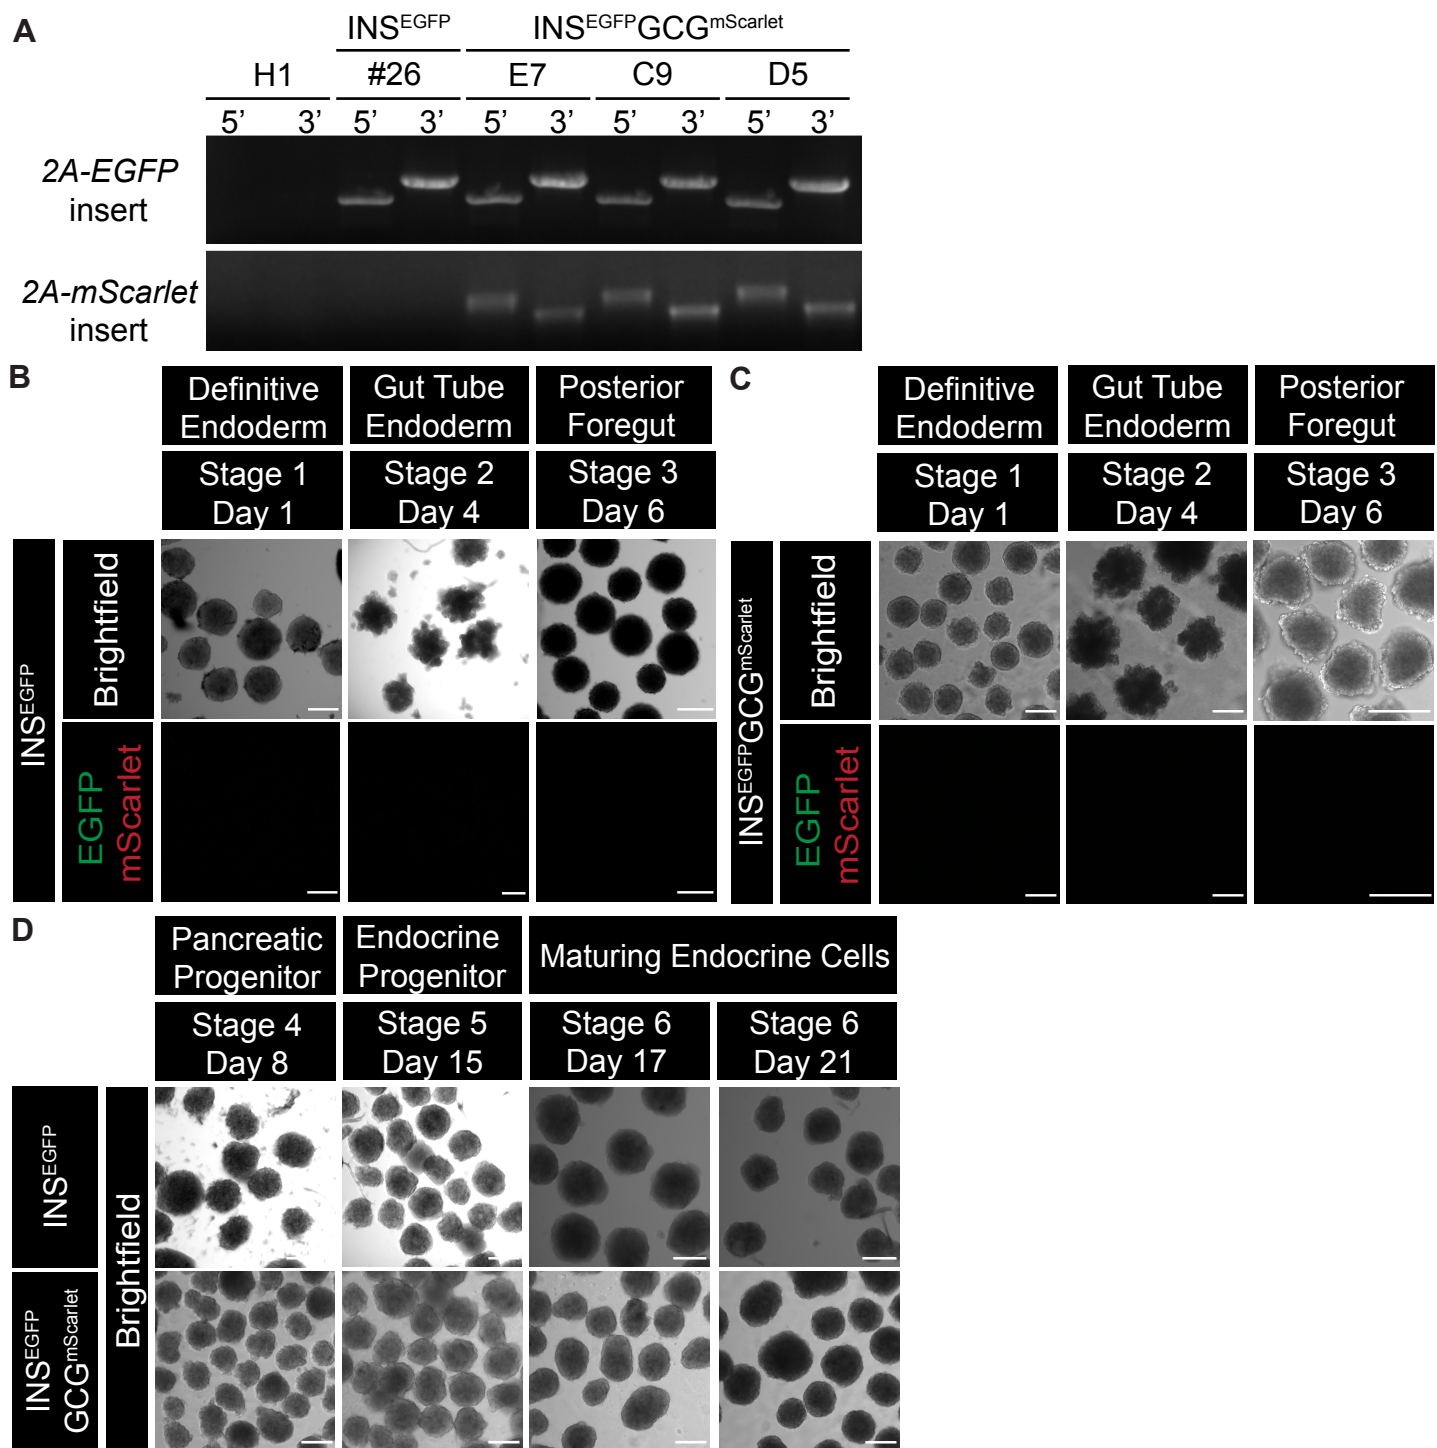

**Figure S1: Generation of INS<sup>EGFP</sup> and INS<sup>EGFP</sup> GCG<sup>mScarlet</sup> reporter human embryonic stem cell (hESC) lines using CRISPR/Cas9.**

(A) Genotyping PCR for 5' and 3' homology arm of the 2A-EGFP and 2A-mScarlet insertion for wildtype H1 parental, INS<sup>EGFP</sup> clone #26, and three of the INS<sup>EGFP</sup> GCG<sup>mScarlet</sup> clones E7, C9 and D5. (B,C) Differentiated spheroids derived from the (B) INS<sup>EGFP</sup> and (C) INS<sup>EGFP</sup> GCG<sup>mScarlet</sup> reporter cell lines expressing EGFP (green) and mScarlet (red) at different stages of pancreatic endocrine cell differentiation. Scale bars = 200  $\mu$ m.

(D) Brightfield images of differentiated spheroids derived from the INS<sup>EGFP</sup> and INS<sup>EGFP</sup> GCG<sup>mScarlet</sup> reporter cell lines at different stages of pancreatic endocrine cell differentiation. Scale bars = 200  $\mu$ m.

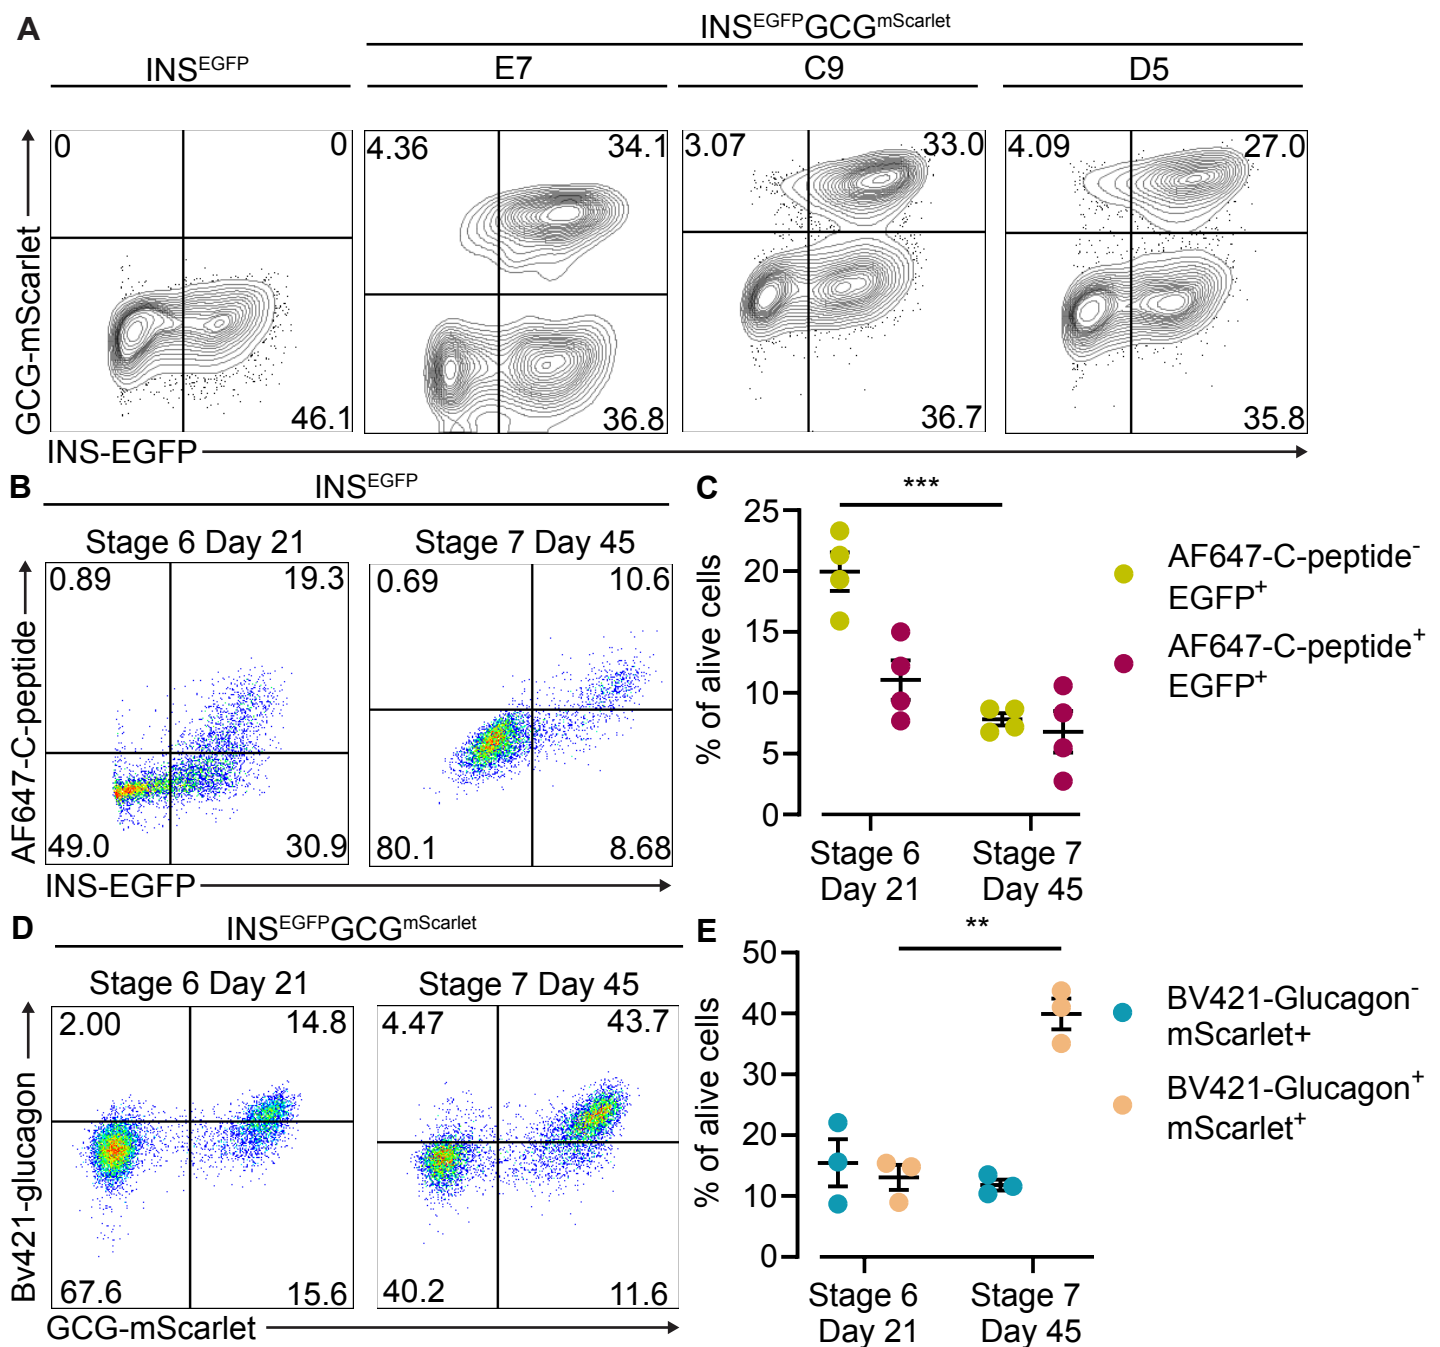

**Figure S2: Majority of reporter-expressing cells co-express corresponding hormone at the mature endocrine cell stage.**

(A) Representative flow cytometry plots showing the differentiation efficiencies (% of alive cells) of the INS<sup>EGFP</sup> and INS<sup>EGFP</sup>GCG<sup>mScarlet</sup> Clones E7, C9, and D5 at the maturing endocrine cell stage (Stage 6 Day 21) (n=3).

(B,C) Representative flow cytometry plots and quantitative analysis illustrating the INS-EGFP reporter efficiency of maturing and mature endocrine cells derived from the INS<sup>EGFP</sup> Clone #26 cell line. \*\*\* =  $p \leq 0.0002$ , n=4, two-way ANOVA, error bars  $\pm$ SEM.

(D,E) Representative flow cytometry plots and quantitative analysis illustrating the GCG-mScarlet reporter efficiency of maturing and mature endocrine cells derived from the INS<sup>EGFP</sup>GCG<sup>mScarlet</sup> Clone E7 reporter cell line. \*\* =  $p \leq 0.0021$ , n=3, two-way ANOVA, error bars  $\pm$ SEM.

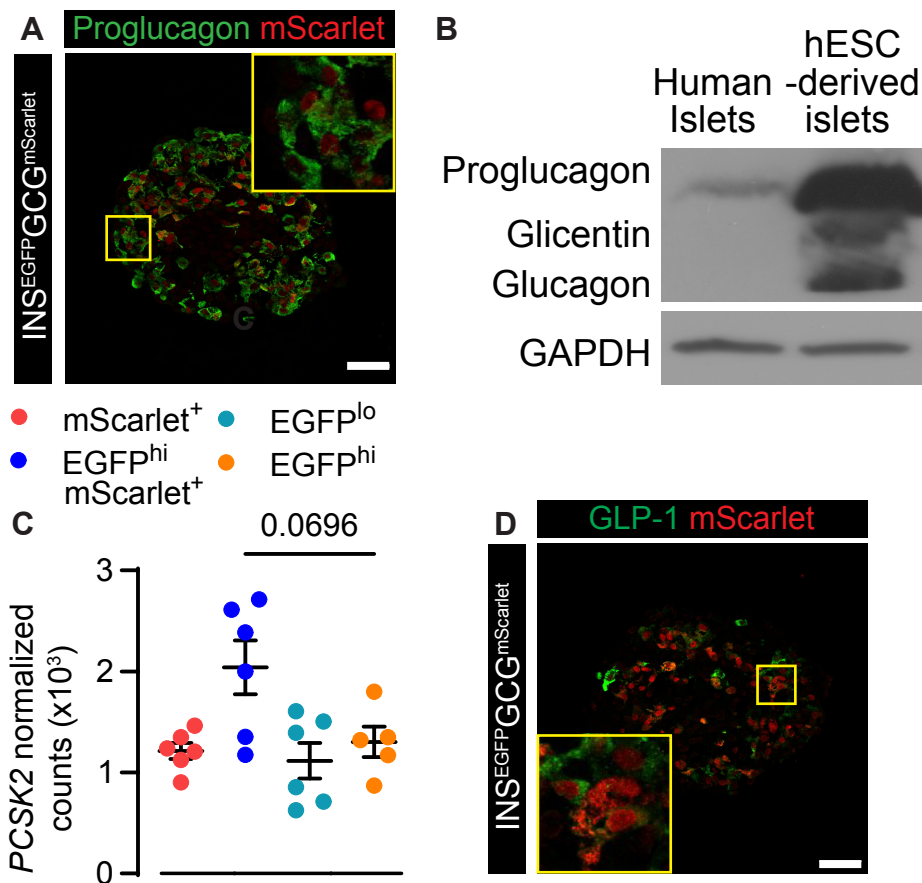

**Figure S3: GCG<sup>mScarlet</sup>-expressing cells co-express glucagon and its precursor proglucagon.**

(A) Immunostaining of proglucagon (green) and mScarlet (red) of maturing pancreatic endocrine cells (Stage 6 Day 28) derived from INS<sup>EGFP</sup>GCG<sup>mScarlet</sup> reporter cell line. Images were obtained on a Leica SP8 confocal microscope. Scale bars = 50  $\mu$ m.

(B) Western blot of proglucagon, glicentin, and glucagon using human islets and H1-derived mature pancreatic endocrine cell (Stage 7 Day 36) lysates.

(C) Transcript expression of *PCSK2* in FACS-sorted maturing pancreatic endocrine cells (Stage 6 Day 25). n = 6, one-way ANOVA, error bars report  $\pm$ SEM.

(D) Immunostaining of GLP-1 (green) and mScarlet (red) of maturing pancreatic endocrine cells (Stage 6 Day 28) derived from INS<sup>EGFP</sup>GCG<sup>mScarlet</sup> reporter cell line. Images were obtained on a Leica SP8 confocal microscope. Scale bars = 50  $\mu$ m.

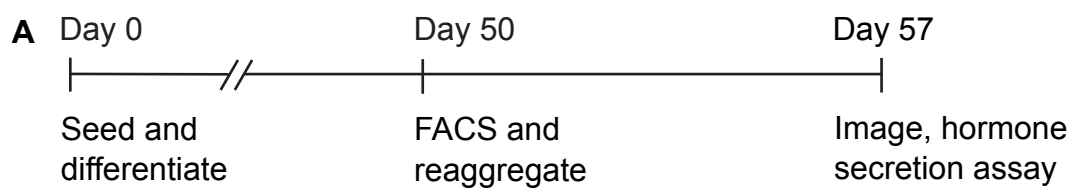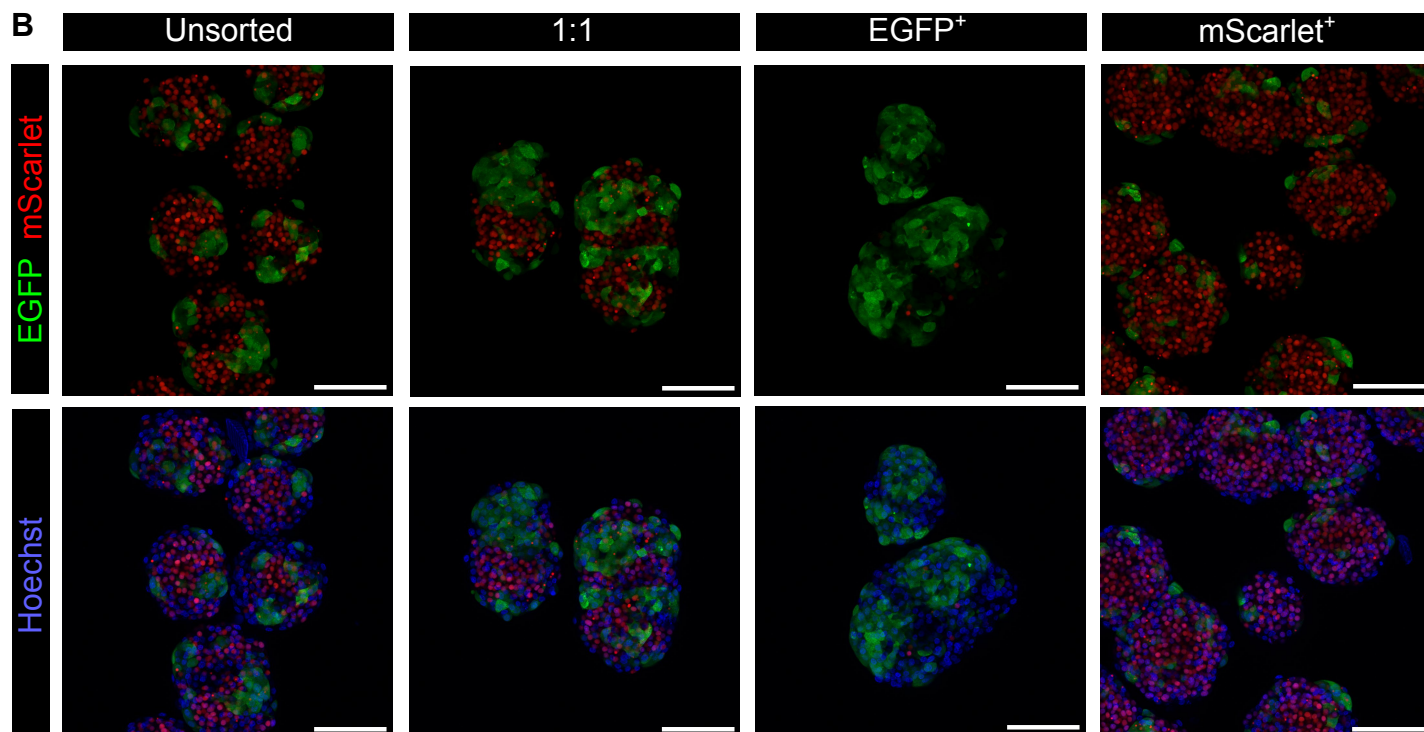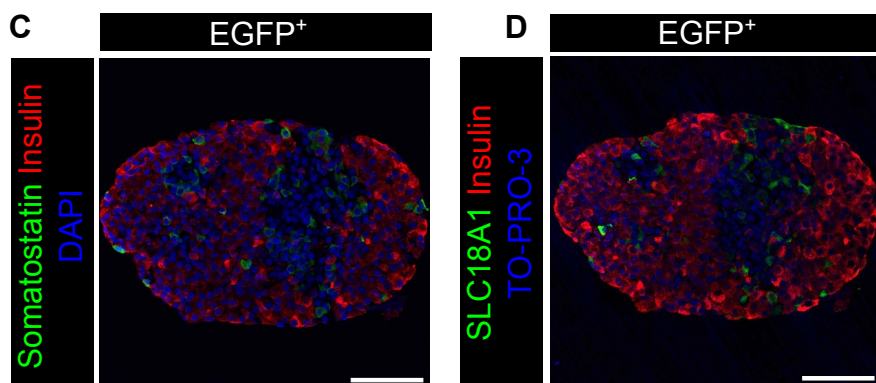

○ 2.8 mM Glucose      ● 16 mM Glucose      ● 16 mM Glucose + 30 mM KCl

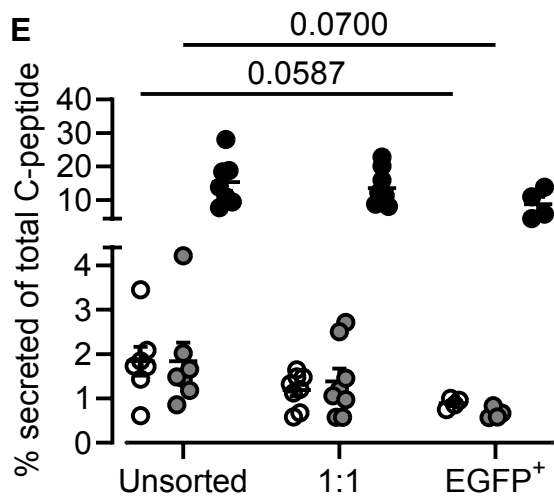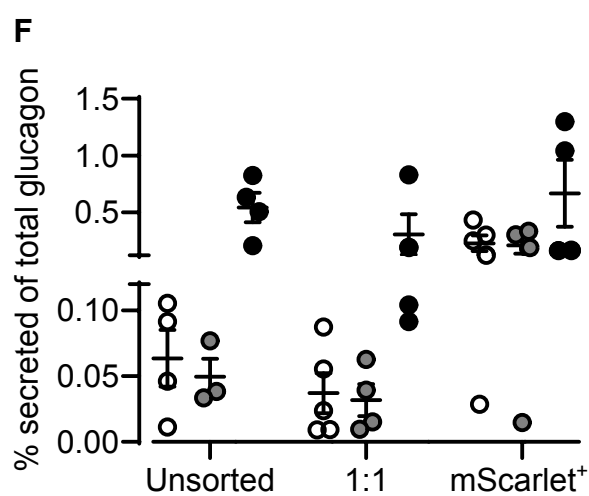



**Figure S4: Reaggregates with a purer endocrine population does not exhibit improved glucose-mediated hormone secretion using current reaggregation protocol.**

(A) Schematic of experimental methodology.

(B) Reaggregated unsorted, 1:1, GFP<sup>+</sup>, and mScarlet<sup>+</sup> mixture of INS<sup>EGFP</sup> and GCG<sup>mScarlet</sup> mature pancreatic endocrine cells (Stage 7 Day 57). Images were obtained on a Leica SP8 confocal microscope. Scale bars = 100µm.

(C) Immunostaining of somatostatin (green), insulin (red), and DAPI (blue) of sorted and reaggregated GFP<sup>+</sup> mature pancreatic endocrine cells (Stage 7 Day 57) derived from INS<sup>EGFP</sup>GCG<sup>mScarlet</sup> reporter cell line. Images were obtained on a Leica SP8. Scale bars = 100 µm.

(D) Immunostaining of SLC18A1 (green), insulin (red), and TO-PRO-3 (blue) of sorted and reaggregated GFP<sup>+</sup> mature pancreatic endocrine cells (Stage 7 Day 57) derived from INS<sup>EGFP</sup>GCG<sup>mScarlet</sup> reporter cell line. Images were obtained on a Leica SP8. Scale bars = 100 µm.

(E) Glucose-stimulated insulin secretion assay using mature pancreatic endocrine cell reaggregates (Stage 7 Day 57) derived from INS<sup>EGFP</sup>GCG<sup>mScarlet</sup> reporter cell line. n = 4-8, two-way ANOVA, error bars report ±SEM.

(F) Glucose-mediated glucagon secretion assay using mature pancreatic endocrine cell reaggregates (Stage 7 Day 57) derived from INS<sup>EGFP</sup>GCG<sup>mScarlet</sup> reporter cell line. n = 4-5, error bars report ±SEM.
